# Supplementary material for: Cellular senescence in hepatocellular carcinoma induced by a long non-coding RNA-encoded peptide PINT87aa by blocking FOXM1-mediated PHB2
Source: Theranostics. 2021 Mar 4;11(10):4929–44. doi: 10.7150/thno.55672 (PMC7978318; doi:10.7150/thno.55672)

## Supplementary Methods

### Identification of Senescence-associated lncRNAs from in silico models

The microarray data of senescence cells which performed on the Affymetrix Human Genome U133 Plus 2.0 Array platform were downloaded from the Gene Expression Omnibus (GEO, <http://www.ncbi.nlm.nih.gov/geo>). To generate comparable data and avoid species variation, we only included the datasets that employed human IMR-90 cell line, a most widely used senescent cell model. Finally, five datasets, including GSE19018 and GSE36640 (to generate the RS model) and GSE19864, GSE40349 and GSE60652 (to generate the OIS model) were used in this study. The raw CEL based files were downloaded and normalized by Robust Multi-array Average (RMA) method. LncRNA annotation from microarray data was conducted according to our previous study [1]. The differentially expressed lncRNAs, which were identified as fold change  $\geq 2.0$  and t-test P value  $< 0.01$ , in replicative senescence (RS) and oncogene-induced senescence (OIS) models, respectively. By overlapping the two lists, common differentially expressed lncRNAs were finally identified as senescence-associated lncRNAs.

### Cellular senescent model conduction

In this study, we treated HCC cells by hydrogen peroxide ( $H_2O_2$ ), which is a widely used method to induce cellular senescence. The concentration of  $H_2O_2$  ranged from 0 to 200  $\mu M$  at interval of 25  $\mu M$ . SA- $\beta$ -gal staining, the widely accepted senescent biomarker, was employed to evaluate the senescent rate of HCC cells after  $H_2O_2$  treatment at 0h, 6h, 12h, 24h, 36h and 48h.

### Other methods

The binding sites of FOXM1 in *PHB2* promoter regions were predicted by hTFtarget (<http://bioinfo.life.hust.edu.cn/hTFtarget#!/prediction>). GSE60032 contained FOXM1 binds directly to non-consensus sequences in the human genome was downloaded from the GEO.

### References

1. L. Wang, Y. Hu, X. Xiang, K. Qu, Y. Teng, Identification of long non-coding RNA signature for paclitaxel-resistant patients with advanced ovarian cancer, *Oncotarget*, 8 (2017) 64191-64202.

**Supplementary table 1. Primers used in this research.**

| Gene symbol    | Forward primer (5' to 3')   | Reverse primer (5' to 3') |
|----------------|-----------------------------|---------------------------|
| LINC-PINT      | GAAGAGGGACTGGAACCATC        | CTCATCTGCGAGGAGACAGG      |
| TMPO-AS1       | CTTTTGTGCGCCGTTTCCT         | CCCAGAGACGAAAGCTGCCT      |
| LOC100129034   | CAGAACGGCGGCAATAATGT        | TGGGTCGGGAACCTTTGGGTA     |
| LINC00973      | TTGAAGGCTTCCTGGTCTGAG       | AGGCTTACATTCCAGCTGTGT     |
| LOC101928198   | TGCTCTAGCAAAGCCTCACTT       | GGGAGAATGAGATGCTGGCTT     |
| LOC101930593   | TCCTTTGGACTGTGCGCTT         | TGTAATTTCTGGGCTCCCTCC     |
| PHB2-Promoter  | TCCAGCCTGGTAGAGACTGAG       | CTCTCTAATATCCACCTATGA     |
| $\beta$ -actin | GGCGGCACCACCATGTACCCT       | AGGGGCCGGACTCGTCATACT     |
| CircPINT       | GCGTTCAGCCCTGGGGTCATAT      | CAGTTTTTCTCTTCCGCAGCTA    |
| LinePINT       | GGCTTGGCTAGTTGGAGAGTT<br>AC | AACTGAAACCAGACCTAAGGTTTTG |

|        |                               |                         |
|--------|-------------------------------|-------------------------|
| ATM    | TTTTCAACCAGTTTTCCGTTAC<br>TTC | ACACTGCGCGTATAAGCCAAT   |
| BMI1   | TGATGTGTGTGCTTTGTGGAGG        | GTGGTCTGGTCTTGTGAACTTGG |
| CCND1  | AAAGGAAGCAAGAACCCAT           | GTCCGAGATTATCATTACCC    |
| CCNE1  | TACACCAGCCACCTCCAGACA<br>C    | CCTCCACAGCTTCAAGCTTTTG  |
| CDK2   | CCAGGAGTTACTTCTATGCCTG<br>A   | TTCATCCAGGGGAGGTACAAC   |
| CDK4   | CGGAGTGAGCAATGGAGTG           | CTAAGGGTAAATCAGGGATAGGG |
| CDK6   | GCACATCAGTAATTCAGTAGAC        | ATAGCCAGGAGAGTAATTCATC  |
| CDKN1A | AGTCAGTTCCTTGTGGAGCC          | CATTAGCGCATCACAGTCGC    |
| CHEK1  | CAGAATTTCAACCTTCGGTGTG        | TCTTCACTGCGACTGCTTCTTC  |
| CHEK2  | TGTCCCTCCCAAACCAGTAGTT<br>GT  | TTACAGCCCCATGGCAGCG     |
| E2F1   | AGTCCCAGCCAGTCTCTACTCA        | TGCCCATCCGGGACAA        |
| E2F3   | TGACCCAATGGTAGGCACAT          | CATCTAGGACCACACCGACA    |
| ETS1   | TTACTCAGCGCCTCGTCCT           | GATCCCCAGTCGTTGCTGTT    |
| ETS2   | CACGGGCCTAATCCTCAGTC          | GAAGGTTTTGTAATTTGGCC    |
| RB1    | TTTGTAACGGGAGTCGGGAGA         | CTCAAGCCTGACGAGAGGCAG   |
| CDKN2A | TGGTCACTGTGAGGATTCAGC         | TCGCACGAACTTCACCAAGA    |
| MDM2   | GCTCATCCTTTACACCAACTCC        | TACCTCCCTTATAGACCATTACG |
| RBL2   | GGAGGAAATTGGGACTCTCTC<br>A    | AGACGACTCAAGCTATGCGTA   |
| TWIST  | GTCCGCAGTCTTACGAGGAG          | GCTTGAGGGTCTGAATCTTGCT  |
| FOXM1  | TGCAGCTAGGGATGTGAATCTT<br>C   | GGAGCCCAGTCCATCAGAACT   |

ATM: ATM serine/threonine kinase; BMI1: BMI1 proto-oncogene, polycomb ring finger; CCND1: cyclin D1; CCNE1: cyclin E1; CDK2: cyclin dependent kinase 2; CDK4: cyclin dependent kinase 4; CDK6: cyclin dependent kinase 6; CDKN1A: cyclin dependent kinase inhibitor 1A; CDKN2A: cyclin dependent kinase inhibitor 2A; CHEK1: checkpoint kinase 1; CHEK2: checkpoint kinase 2; E2F1: E2F transcription factor 1; E2F3: E2F transcription factor 3; ETS1: ETS proto-oncogene 1, transcription factor; ETS2: ETS proto-oncogene 2, transcription factor; RB1: RB transcriptional corepressor 1; RBL2: RB transcriptional corepressor like 2; MDM2: MDM2 proto-oncogene; TWIST1: twist family bHLH transcription factor 1. FOXM1: forkhead box M1.

**Supplementary table 2. Antibodies used in this research.**

| Name     | Source | Catalog Number            | Application and dilution                    |
|----------|--------|---------------------------|---------------------------------------------|
| PINT87aa | Rabbit | Genscript, Nanjing        | WB: 1:1000; IHC:1:50<br>IP: 1:200; IF:1:500 |
| FOXM1    | Rabbit | (D3F2B) #20459, CST       | WB: 1:1000; IHC:1:600<br>IP: 1:100          |
|          | Mouse  | Sc-376471, Santa Cruz Bio | IP: 1:100; IF:1:200                         |

|                                            |        |                          |                       |
|--------------------------------------------|--------|--------------------------|-----------------------|
| PHB2                                       | Rabbit | CY8226, Abways           | WB: 1:1000; IHC:1:200 |
| Ki67                                       | Rabbit | GB111141, Servicebio     | IHC:1:1500            |
| LC3B                                       | Rabbit | (D11) #3868, CST         | WB: 1:1000            |
| PINK1                                      | Rabbit | (D8G3) #6946, CST        | WB: 1:1000            |
| Parkin                                     | Rabbit | CY6641, Abways           | WB: 1:1000            |
| P62                                        | Rabbit | 18420-1-AP, Proteintech  | WB: 1:1000            |
| β-actin                                    | Mouse  | YM3028, Immunoway        | WB: 1:5000            |
| COXIV                                      | Rabbit | 11242-1-AP, Proteintech  | WB: 1:5000; IF:1:200  |
| LAMP1                                      | Mouse  | Sc-20011, Santa Cruz Bio | IF:1:200              |
| Goat Anti-Mouse IgG (H+L)-Alexa Fluor 647  | Mouse  | RS3808, Immunoway        | IF: 1:500             |
| Goat Anti-Rabbit IgG (H+L)-Alexa Fluor 488 | Rabbit | RS3211, Immunoway        | IF: 1:500             |
| Goat Anti-Mouse IgG (H+L)-HRP              | Mouse  | AB0102, Abways           | WB: 1:10000           |
| Goat Anti-Rabbit IgG (H+L)-HRP             | Rabbit | AB0101, Abways           | WB: 1:10000           |

**Supplementary table 3. Fold change of senescence-associated lncRNAs in HCC cells**

| Gene symbol  | Average fold change<br>(Senescent/Proliferating cells) | <i>P</i> -Value |
|--------------|--------------------------------------------------------|-----------------|
| LINC-PINT    | 10.032                                                 | <0.001          |
| TMPO-AS1     | 0.221                                                  | <0.05           |
| LOC100129034 | 1.245                                                  | >0.05           |
| LINC00973    | 1.197                                                  | >0.05           |
| LOC101928198 | 1.003                                                  | >0.05           |
| LOC101930593 | 0.945                                                  | >0.05           |

Supplementary figures and figure legends

A

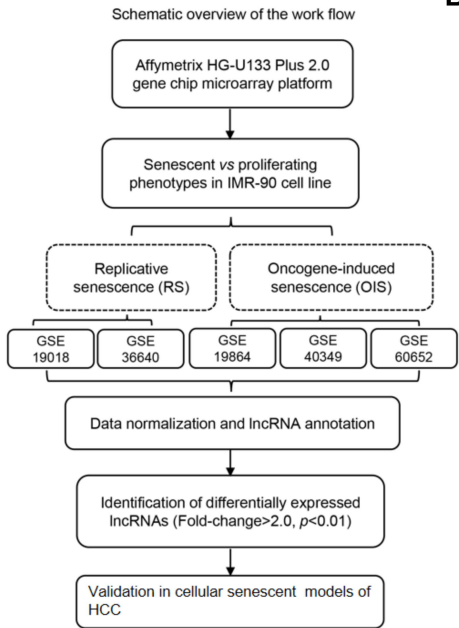

B

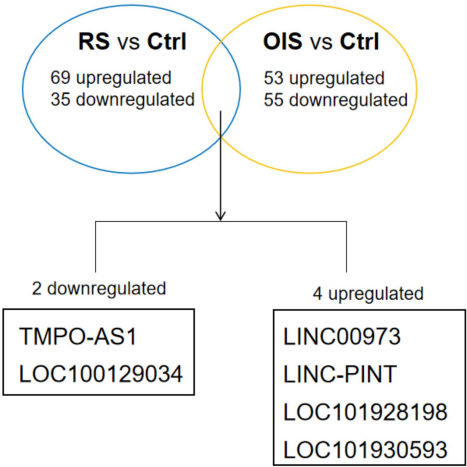

C

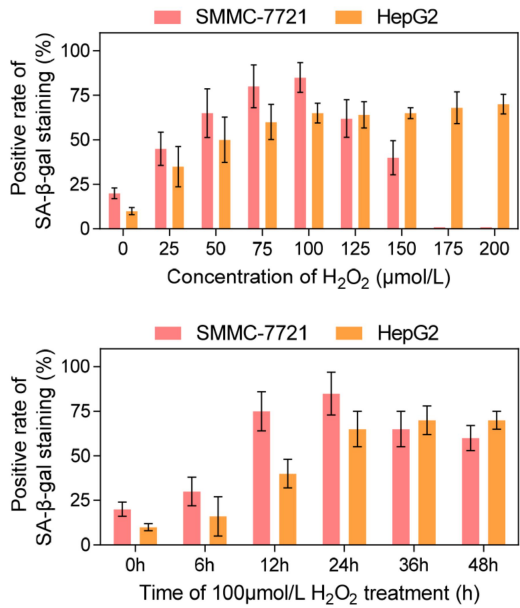

D

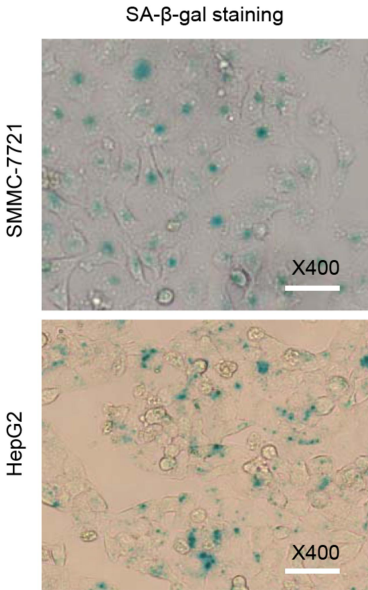

E

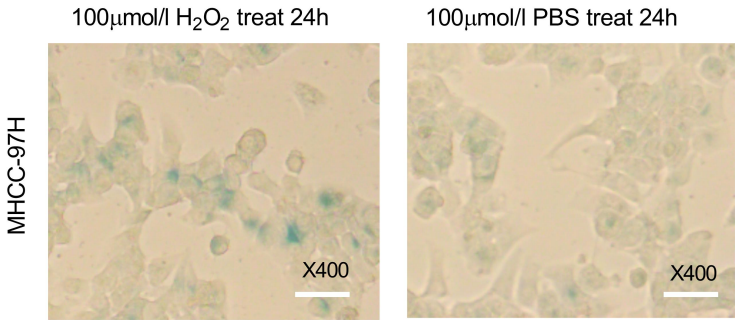

**Figure S1. Identification of SA-lncRNAs from *in silico* models and conduction of cellular senescent model.** (A) The workflow of identification of SA-lncRNAs in senescnet HCC cells. (B) Schematic diagram of identifying SA-lncRNAs *in silico* models. (C) The dose-dependent and time-dependent manner of H<sub>2</sub>O<sub>2</sub> induced cellular senescence. (D) SA-β-gal staining in H<sub>2</sub>O<sub>2</sub> induced senescent SMMC-7721 and HepG2 cells. (E) SA-β-gal staining validated the efficiency of H<sub>2</sub>O<sub>2</sub> induced senescent model in MHCC-97H cells. H<sub>2</sub>O<sub>2</sub>, hydrogen peroxide; SA-lncRNAs, senescence-associated lncRNAs.

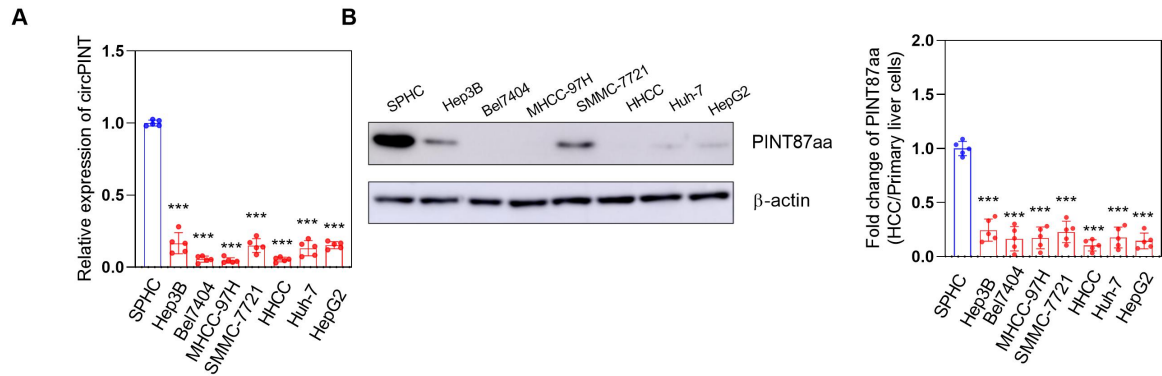

**Figure S2. The expression of circPINT and PINT87aa in senescent primary liver cells and HCC cell lines.** The expression of circPINT(A) and PINT87aa (B) in senescent primary hepatocytes (SPHC) and HCC cell lines. \*\*\* $P < 0.001$ . SPHC: Senescent primary hepatocytes.

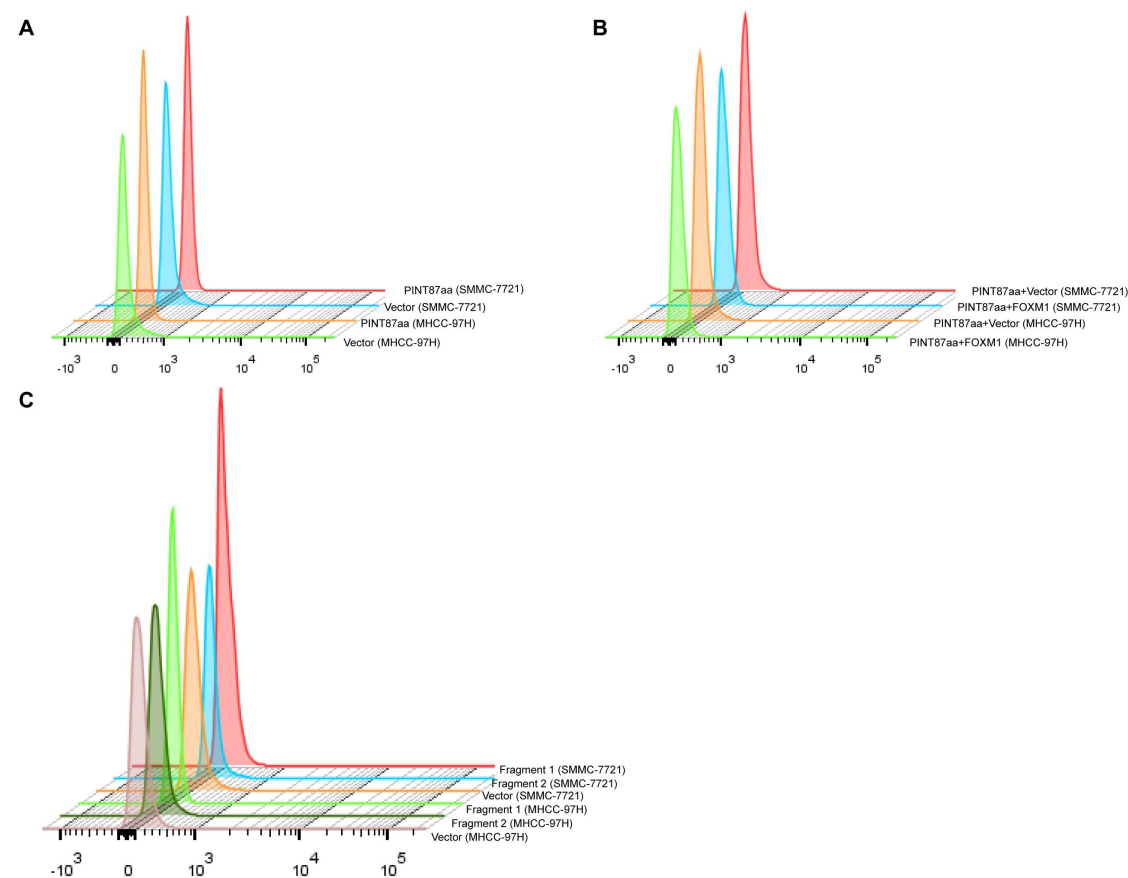

**Figure S3. CellEvent Senescence Green Flow Cytometry Assay validated PINT87aa and**

fragment 1 induced cellular senescence and reverse effect of FOXM1 on PINT87aa.

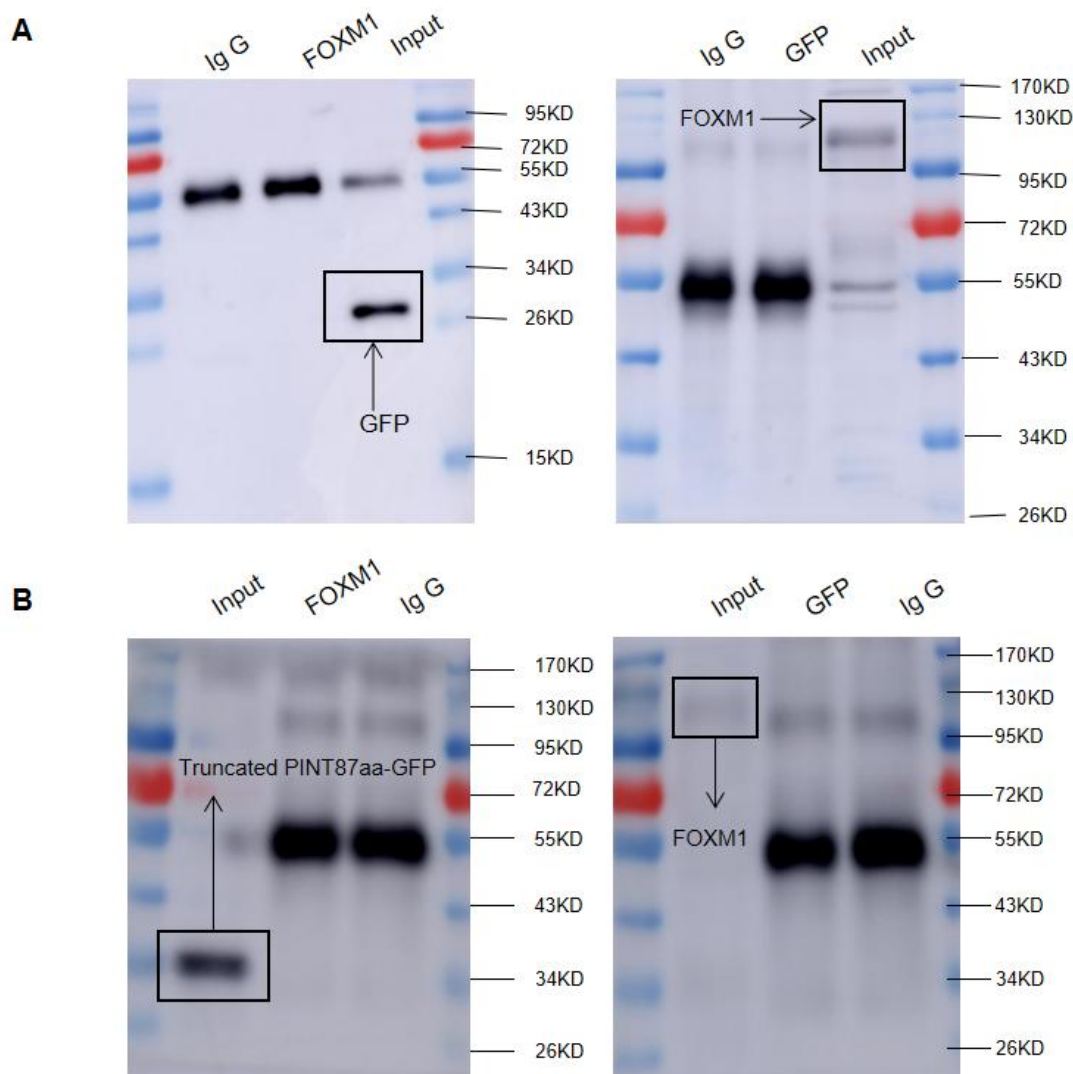

**Figure S4. Co-immunoprecipitation verified the combination ability of FOXM1 and GFP or truncated PINT87aa-GFP.** (A) Co- immunoprecipitation was performed using an anti-GFP antibody and anti-FOXM1 antibody in FOXM1 and GFP co-transfected HEK293 cells respectively. (B) Co- immunoprecipitation was performed using an anti-GFP antibody and anti-FOXM1 antibody in truncated PINT87aa-GFP and FOXM1 co-transfected HEK293 cells respectively.

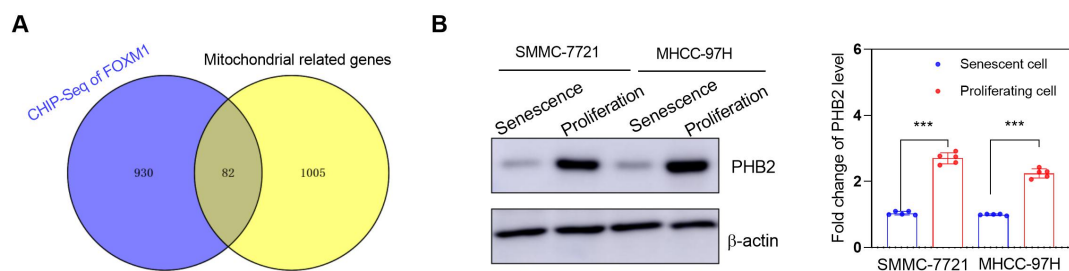

**Figure S5. Mitophagy was inhibited in senescent HCC cells.** (A) The overlapping of FOXM1 target genes of the GEO dataset GSE60032 and genes related to mitochondrial

function. (B) The expression of PHB2 was detected in senescent and proliferating HCC cells.  
 $***P < 0.001$ .

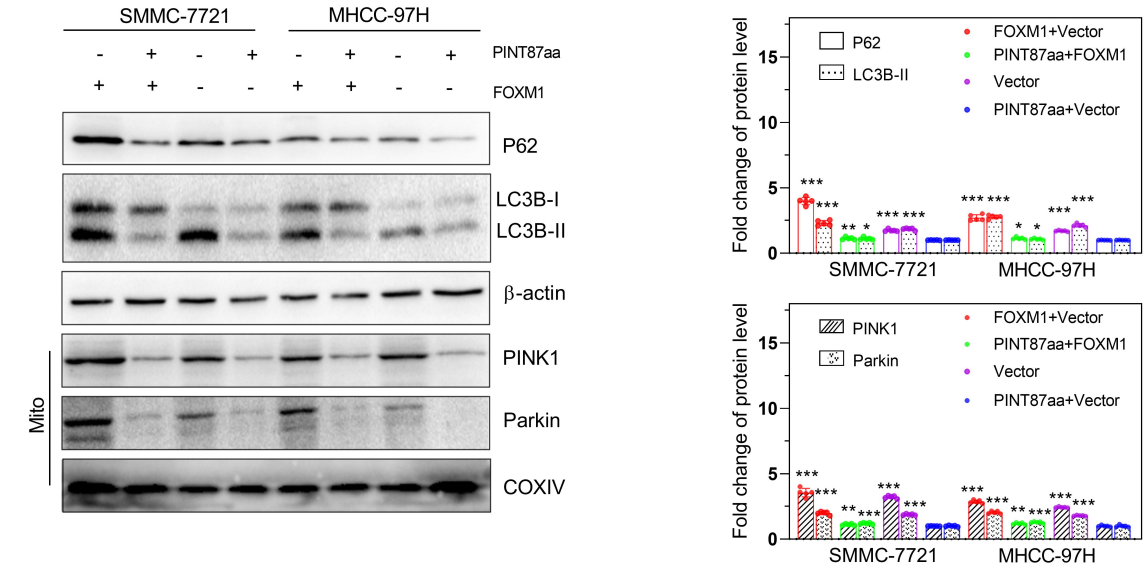

**Figure S6. The reverse effects of FOXM1 on the expression of mitophagy-related protein.**  
 $*P < 0.05$ ;  $**P < 0.01$ ;  $***P < 0.001$ .

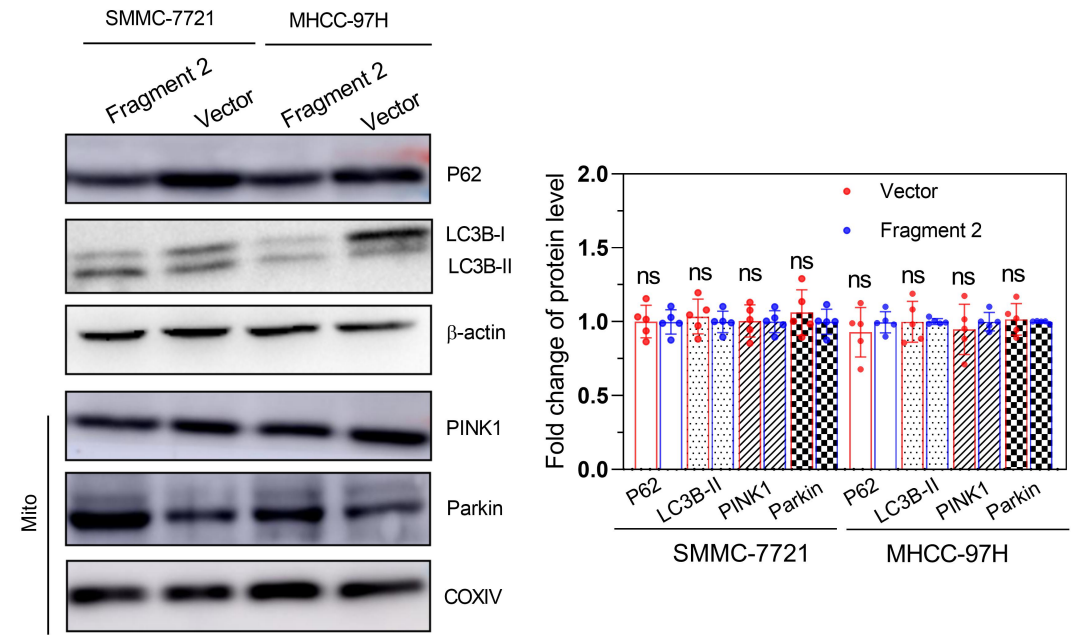

**Figure S7. The effects of fragment 2 on the expression of mitophagy-related protein.** ns  $P > 0.05$ .

**Figure 6C:**

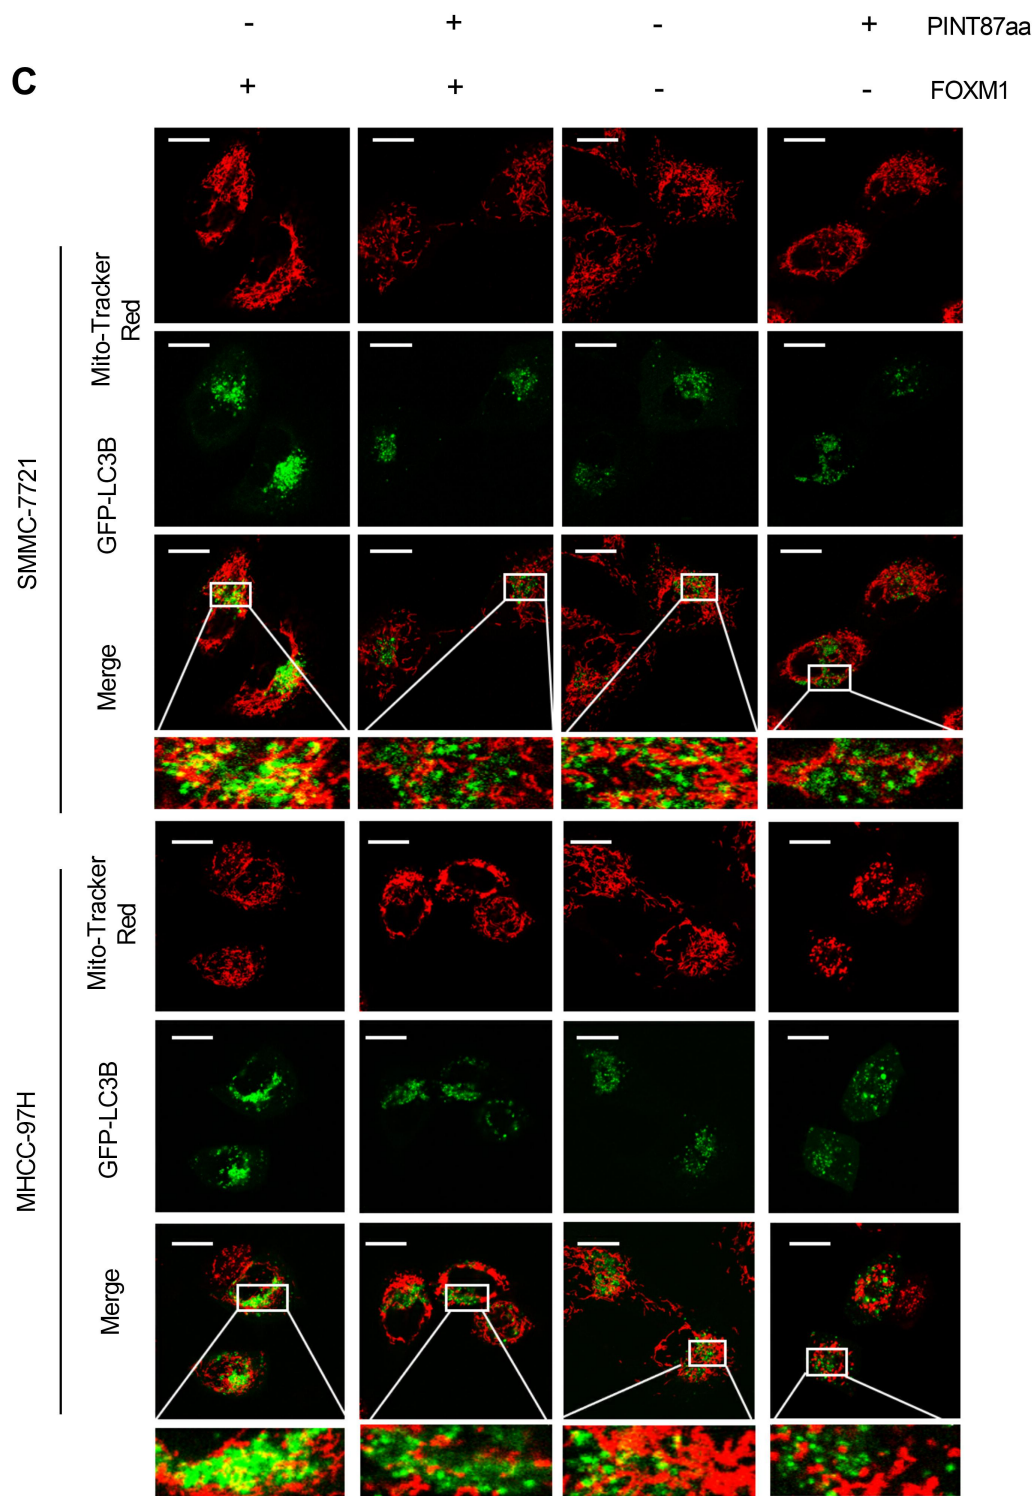

Supplement: Supplementary file 1 — Supplementary methods, figures and tables. [file thnov11p4929s1.pdf]
